Supplemental Information:

Figure S1: Nitrogen fixation rates measured for each moss species. Rates are in units of  $\mu\text{g N} \cdot \text{g dry weight moss}^{-1} \text{d}^{-1}$ .

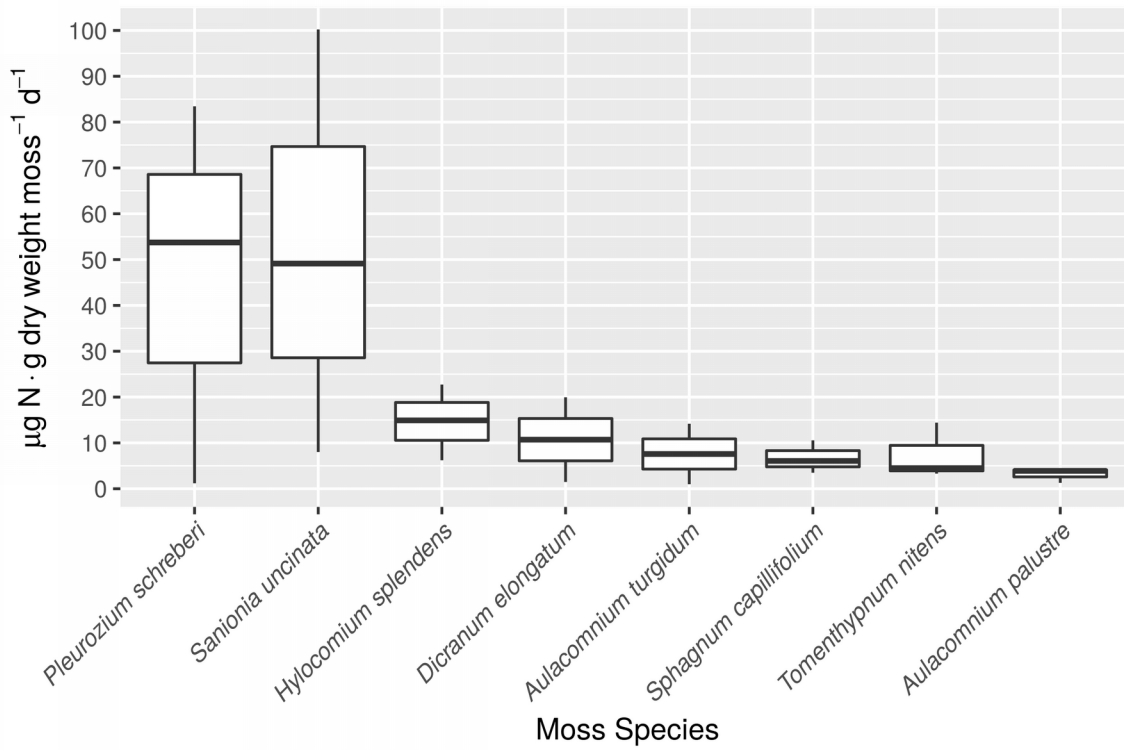

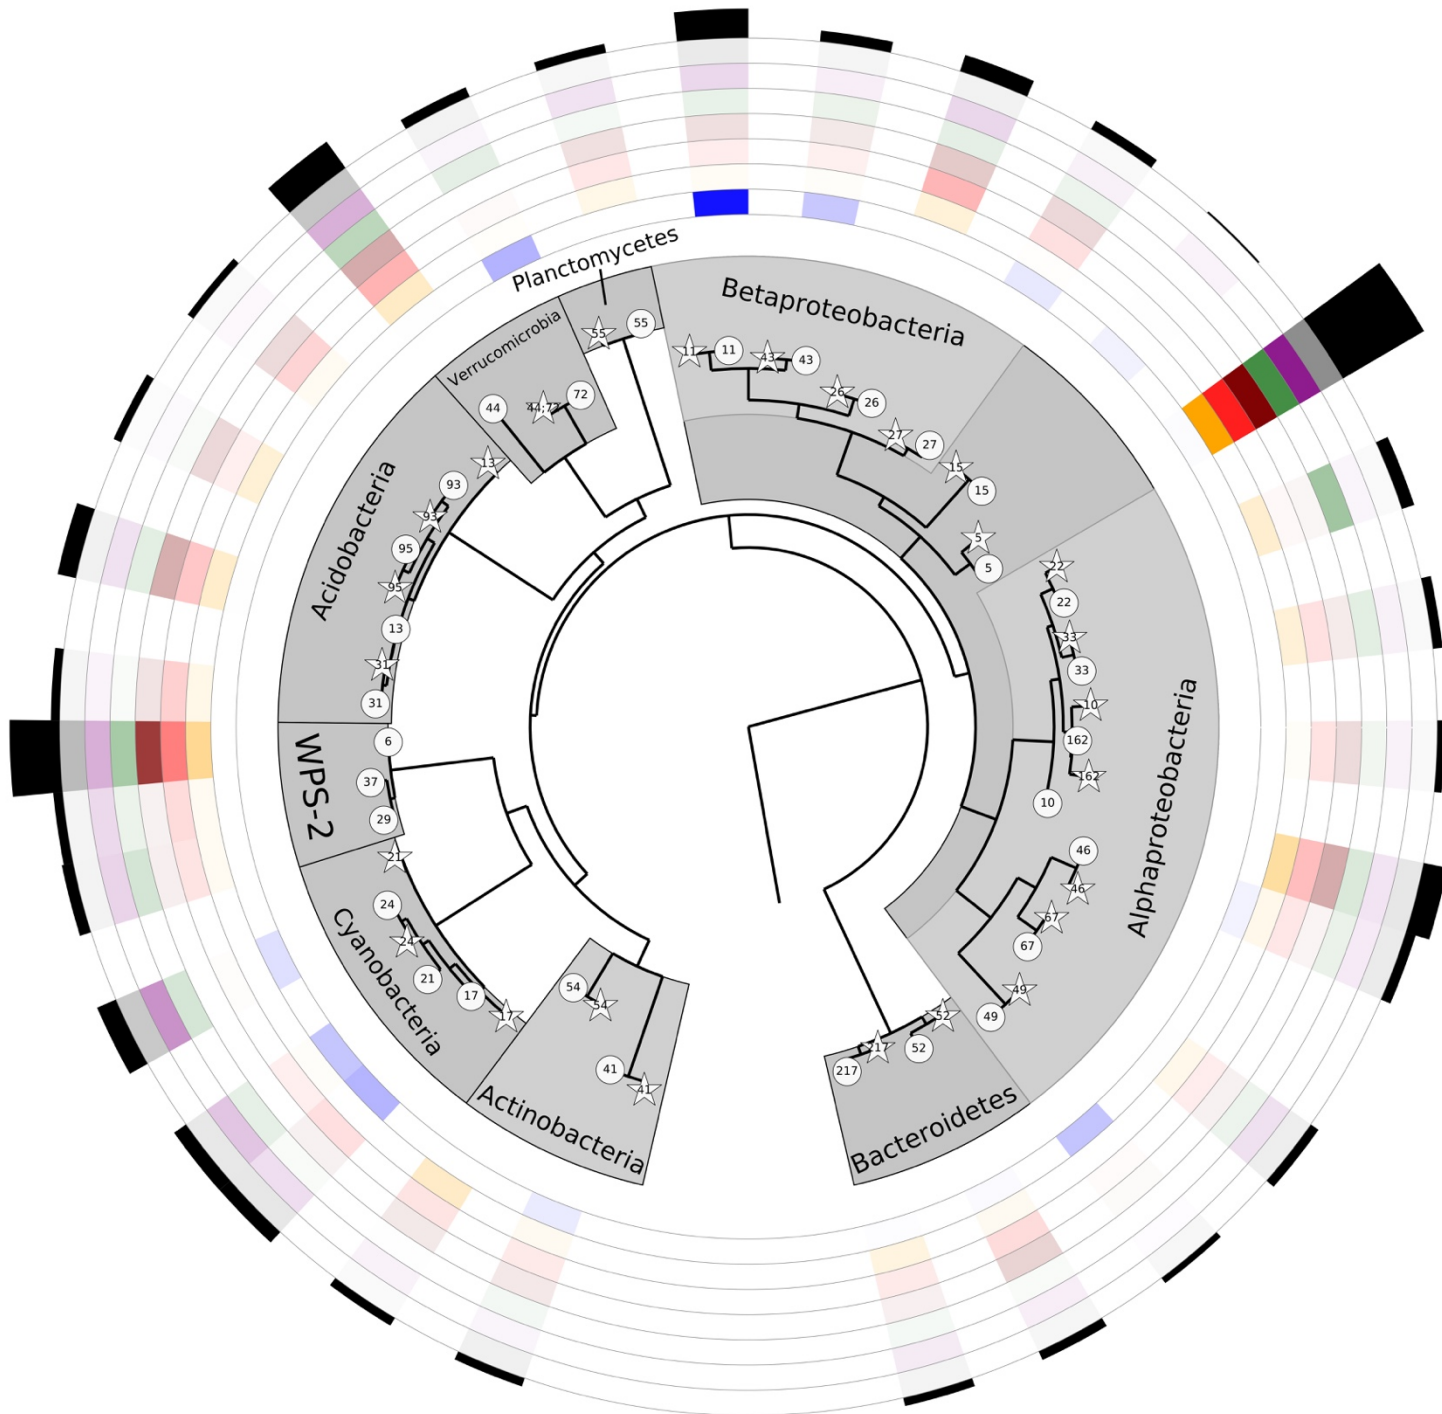

- Sequenced phylotype
- ☆ Nearest isolated relative

### Rings

- Sanionia uncinata*
- Dicranum elongatum*
- Aulacomnium turgidum*
- Pleurozium schreberi*
- Sphagnum capillifolium*
- Aulacomnium palustre*
- Tomenthypnum nitens*
- Total Mean Relative Abundance

Figure S2: A phylogenetic tree of the top 30 phylotypes (circles) and their nearest isolated relatives (stars). The top 30 phylotypes represented here account for 35% of the 16S rRNA gene reads in the dataset. Each inner colored ring represents a different species of moss, from the inside ring to the outer ring they are: *Sanionia uncinata* (blue), *Dicranum elongatum*. (yellow), *Aulacomnium turgidum* (bright red), *Pleurozium schreberi* (dark red), *Sphagnum capillifolium* (green), *Aulacomnium palustre* (purple), *Tomenthypnum nitens* (gray). The opacity of the colored rings represents the relative abundance (log transformed and scaled between 0 and 1) of the different phylotypes within in each host moss species. The black outer ring represents the total relative abundance of each phylotype across all species (also log transformed and scaled between 0 and 1).

Figure S3: Comparison of the relative abundances of the top 8 phyla in the amplicon sequencing and Metaxa2-derived shotgun metagenomic sequences. Despite the different methods used to infer bacterial community composition, the abundances of the phyla were similar.

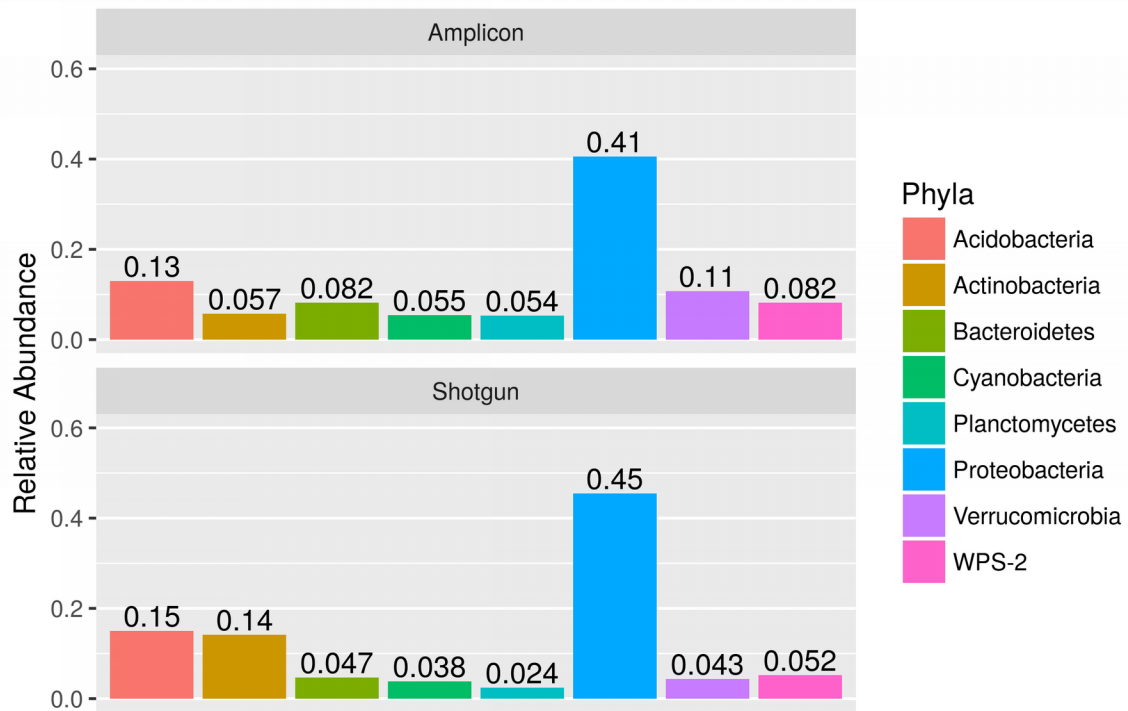

Table S1: Voucher specimen information for each moss sample

| <b>Taxon</b>                  | <b>Authority</b>      | <b>Collector</b> | <b>Collection #<br/>(site-species #)</b> | <b>Herbarium</b> |
|-------------------------------|-----------------------|------------------|------------------------------------------|------------------|
| <i>Aulacomnium palustre</i>   | (Hedw.) Schwägr.      | M. Mack          | 1-3                                      | FLAS             |
| <i>Aulacomnium palustre</i>   | (Hedw.) Schwägr.      | M. Mack          | 2-3                                      | FLAS             |
| <i>Aulacomnium palustre</i>   | (Hedw.) Schwägr.      | M. Mack          | 3-3                                      | FLAS             |
| <i>Aulacomnium turgidum</i>   | (Wahlenb.) Schwägr.   | M. Mack          | 1-6                                      | FLAS             |
| <i>Aulacomnium turgidum</i>   | (Wahlenb.) Schwägr.   | M. Mack          | 2-6                                      | FLAS             |
| <i>Aulacomnium turgidum</i>   | (Wahlenb.) Schwägr.   | M. Mack          | 3-6                                      | FLAS             |
| <i>Dicranum elongatum</i>     | Schleich. ex Schwägr. | M. Mack          | 1-8                                      | FLAS             |
| <i>Dicranum elongatum</i>     | Schleich. ex Schwägr. | M. Mack          | 3-8                                      | FLAS             |
| <i>Pleurozium schreberi</i>   | (Brid.) Mitt.         | M. Mack          | 1-2                                      | FLAS             |
| <i>Pleurozium schreberi</i>   | (Brid.) Mitt.         | M. Mack          | 2-2                                      | FLAS             |
| <i>Pleurozium schreberi</i>   | (Brid.) Mitt.         | M. Mack          | 3-2                                      | FLAS             |
| <i>Sanionia uncinata</i>      | (Hedw.) Loeske        | M. Mack          | 1-4                                      | FLAS             |
| <i>Sanionia uncinata</i>      | (Hedw.) Loeske        | M. Mack          | 2-4                                      | FLAS             |
| <i>Sanionia uncinata</i>      | (Hedw.) Loeske        | M. Mack          | 3-4                                      | FLAS             |
| <i>Sphagnum capillifolium</i> | (Ehrh.) Hedw.         | M. Mack          | 1-7                                      | FLAS             |
| <i>Sphagnum capillifolium</i> | (Ehrh.) Hedw.         | M. Mack          | 2-7                                      | FLAS             |
| <i>Sphagnum capillifolium</i> | (Ehrh.) Hedw.         | M. Mack          | 3-7                                      | FLAS             |
| <i>Tomentypnum nitens</i>     | (Hedw.) Loeske        | M. Mack          | 1-5                                      | FLAS             |
| <i>Tomentypnum nitens</i>     | (Hedw.) Loeske        | M. Mack          | 2-5                                      | FLAS             |
| <i>Tomentypnum nitens</i>     | (Hedw.) Loeske        | M. Mack          | 3-5                                      | FLAS             |
| <i>Hylcomium splendens</i>    | (Hedw.) Shimp         | M. Mack          | 1-1                                      | FLAS             |
| <i>Hylocomium splendens</i>   | (Hedw.) Shimp         | M. Mack          | 2-1                                      | FLAS             |
| <i>Hylocomium splendens</i>   | (Hedw.) Shimp         | M. Mack          | 3-1                                      | FLAS             |

Table S2: Genome Bins Passing Quality Filter

Genome bins were assessed for completeness and contamination using CheckM (see paper). Briefly, completeness and contamination are calculated based on the percentage of conserved single-copy marker genes in a bin and the number of duplicates of each single-copy marker genes in each bin. The marker genes used in this assessment were chosen based on the inferred lineage of each bin. The 7 genomes that were identified as being greater than 70% complete and less than 10% contaminated (duplicates) were considered as passing quality filter, and are listed in the table below. The genome sizes were estimated by using the number of base pairs in each bin and the percent completion estimate.

| <b>Genome Bin</b> | <b>Classification</b> | <b>Percent complete</b> | <b>Percent contaminated</b> | <b>Estimated Genome Size (Mbp)</b> |
|-------------------|-----------------------|-------------------------|-----------------------------|------------------------------------|
| 61                | Cyanobacteria         | 96.51                   | 4.11                        | 8.88                               |
| 29                | WPS-2                 | 89.51                   | 4.82                        | 3.88                               |
| 44                | WPS-2                 | 88.79                   | 1.83                        | 4.34                               |
| 33                | WPS-2                 | 84.46                   | 7.82                        | 3.41                               |
| 54                | Acidobacteria         | 82.66                   | 9.44                        | 7.61                               |
| 53                | Cyanobacteria         | 72.52                   | 2.85                        | 9.8                                |
| 49                | Alphaproteobacteria   | 70.49                   | 6.46                        | 4.04                               |

Table S3: Nearest isolated relatives of abundant bacterial phylotypes identified from the sampled moss species.

| Phylotype    | Relative Abundance | RDP ID     | RDP Similarity Score | RDP Sequence Name                                              | GreenGenes-assigned taxonomy                                                                                                    |
|--------------|--------------------|------------|----------------------|----------------------------------------------------------------|---------------------------------------------------------------------------------------------------------------------------------|
| Phylotype_5  | 0.07               | S000995323 | 0.94                 | Steroidobacter denitrificans (T); FS; EF605262                 | k__Bacteria; p__Proteobacteria; c__Gammaproteobacteria; o__Xanthomonadales; f__Sinobacteraceae; g__; s__                        |
| Phylotype_6  | 0.04               | S002350837 | 0.82                 | Thermosinus carboxydivorans; type strain: DSM 14886; FR749974  | k__Bacteria; p__WPS-2; c__; o__; f__; g__; s__                                                                                  |
| Phylotype_10 | 0.02               | S003312544 | 0.94                 | Endobacter medicaginis (T); M1MS02; JQ436923                   | k__Bacteria; p__Proteobacteria; c__Alphaproteobacteria; o__Rhodospirillales; f__Acetobacteraceae; g__; s__                      |
| Phylotype_11 | 0.02               | S000627892 | 1                    | Rhizobacter fulvus (T); Gsoil 322; AB245356                    | k__Bacteria; p__Proteobacteria; c__Betaproteobacteria; o__Burkholderiales; f__Comamonadaceae; g__Methylibium; s__               |
| Phylotype_13 | 0.01               | S000941899 | 0.98                 | Granulicella aggregans (T); type strain: TPB6028; AM887756     | k__Bacteria; p__Acidobacteria; c__Acidobacteriia; o__Acidobacteriales; f__Acidobacteriaceae; g__; s__                           |
| Phylotype_15 | 0                  | S000011435 | 1                    | Pseudomonas graminis; HhSaOsb; AF511514                        | k__Bacteria; p__Proteobacteria; c__Gammaproteobacteria; o__Pseudomonadales; f__Pseudomonadaceae; g__Pseudomonas; s__viridiflava |
| Phylotype_17 | 0.01               | S004215061 | 1                    | Nostoc sp. Protopannaria pezizoides UK120 cyanobiont; KF359684 | k__Bacteria; p__Cyanobacteria; c__Nostocophycideae; o__Nostocales; f__Nostocaceae; g__Nostoc; s__                               |
| Phylotype_21 | 0.01               | S000457688 | 1                    | Nostoc commune; SO-42; AB098071                                | k__Bacteria; p__Cyanobacteria; c__Nostocophycideae; o__Nostocales; f__Nostocaceae; g__Nostoc; s__                               |

|              |      |            |      |                                                         |                                                                                                                                     |
|--------------|------|------------|------|---------------------------------------------------------|-------------------------------------------------------------------------------------------------------------------------------------|
| Phylotype_22 | 0.01 | S000443861 | 0.96 | Acidocella sp. M21;<br>AY765998                         | k__Bacteria;<br>p__Proteobacteria;<br>c__Alphaproteobacteria;<br>o__Rhodospirillales;<br>f__Acetobacteraceae;<br>g__Acidocella; s__ |
| Phylotype_24 | 0.01 | S000749734 | 1    | Gloeotrichia echinulata<br>PYH6; AM230703               | k__Bacteria;<br>p__Cyanobacteria;<br>c__Nostocophycideae;<br>o__Nostocales;<br>f__Nostocaceae; g__ ; s__                            |
| Phylotype_26 | 0.01 | S000398336 | 1    | Paraburkholderia<br>glathei; Hg5; AY154370              | k__Bacteria;<br>p__Proteobacteria;<br>c__Betaproteobacteria;<br>o__Burkholderiales;<br>f__Burkholderiaceae;<br>g__Burkholderia      |
| Phylotype_27 | 0.01 | S000415015 | 0.97 | Derxia gummosa; IAM<br>14990; AB089481                  | k__Bacteria;<br>p__Proteobacteria;<br>c__Betaproteobacteria;<br>o__Burkholderiales; f__ ; g__ ;<br>s__                              |
| Phylotype_29 | 0.01 | S000891994 | 0.79 | Carboxydocella<br>ferrireducens; 019;<br>EF092457       | k__Bacteria; p__WPS-2; c__ ;<br>o__ ; f__ ; g__ ; s__                                                                               |
| Phylotype_31 | 0.01 | S000941902 | 0.97 | Granulicella rosea (T);<br>type strain: T4;<br>AM887759 | k__Bacteria; p__Acidobacteria;<br>c__Acidobacteriia;<br>o__Acidobacteriales;<br>f__Acidobacteriaceae; g__ ; s__                     |
| Phylotype_33 | 0.01 | S001093906 | 0.99 | Acidisoma tundrae (T);<br>type strain: WM1;<br>AM947652 | k__Bacteria;<br>p__Proteobacteria;<br>c__Alphaproteobacteria;<br>o__Rhodospirillales;<br>f__Acetobacteraceae;<br>g__Acidisoma; s__  |
| Phylotype_37 | 0.01 | S000543874 | 0.75 | Paenibacillus terrae;<br>MH72; AJ318910                 | k__Bacteria; p__WPS-2; c__ ;<br>o__ ; f__ ; g__ ; s__                                                                               |
| Phylotype_41 | 0.01 | S000126222 | 1    | Antarctic bacterium R-<br>9112; AJ441003                | k__Bacteria;<br>p__Actinobacteria;<br>c__Actinobacteria;<br>o__Actinomycetales;<br>f__Microbacteriaceae;<br>g__Salinibacterium; s__ |
| Phylotype_43 | 0.01 | S001291898 | 1    | Leptothrix sp. PW10C;<br>AB480712                       | k__Bacteria;<br>p__Proteobacteria;<br>c__Betaproteobacteria;<br>o__Burkholderiales;<br>f__Comamonadaceae; g__ ; s__                 |
| Phylotype_44 | 0.02 | S000515723 | 0.86 | bacterium Ellin507;<br>AY960770                         | k__Bacteria;<br>p__Verrucomicrobia;<br>c__[Methylacidiphilae];<br>o__Methylacidiphilales; f__ ;<br>g__ ; s__                        |



|               |      |            |      |                                                                                                |                                                                                                                                                     |
|---------------|------|------------|------|------------------------------------------------------------------------------------------------|-----------------------------------------------------------------------------------------------------------------------------------------------------|
| Phylotype_46  | 0.01 | S000143080 | 1    | Bradyrhizobium sp. 1;<br>AY238503                                                              | k__Bacteria;<br>p__Proteobacteria;<br>c__Alphaproteobacteria;<br>o__Rhizobiales;<br>f__Bradyrhizobiaceae;<br>g__Bradyrhizobium; s__                 |
| Phylotype_49  | 0    | S000017317 | 1    | Sphingomonas sp.<br>BF14; BF14 (bright<br>yellow group 1 colony<br>type) = DSM 9257;<br>Z23157 | k__Bacteria;<br>p__Proteobacteria;<br>c__Alphaproteobacteria;<br>o__Sphingomonadales;<br>f__Sphingomonadaceae;<br>g__Sphingomonas;<br>s__echinoides |
| Phylotype_52  | 0.01 | S001588687 | 0.99 | Mucilaginibacter<br>mallensis (T); type<br>strain: MP1X4;<br>FN400859                          | k__Bacteria; p__Bacteroidetes;<br>c__Sphingobacteriia;<br>o__Sphingobacteriales;<br>f__Sphingobacteriaceae; g__;<br>s__                             |
| Phylotype_54  | 0.01 | S000515720 | 1    | bacterium Ellin504;<br>AY960767                                                                | k__Bacteria;<br>p__Actinobacteria;<br>c__Thermoleophilia;<br>o__Solirubrobacterales;<br>f__Conexibacteraceae; g__; s__                              |
| Phylotype_55  | 0.01 | S000403461 | 0.97 | bacterium Ellin5111;<br>AY234528                                                               | k__Bacteria;<br>p__Planctomycetes;<br>c__Planctomycetia;<br>o__Gemmatales;<br>f__Isosphaeraceae; g__; s__                                           |
| Phylotype_67  | 0.01 | S000395297 | 0.98 | bacterium Ellin340;<br>AF498722                                                                | k__Bacteria;<br>p__Proteobacteria;<br>c__Alphaproteobacteria;<br>o__Rhizobiales;<br>f__Methylocystaceae; g__; s__                                   |
| Phylotype_72  | 0.01 | S000515723 | 0.98 | bacterium Ellin507;<br>AY960770                                                                | k__Bacteria;<br>p__Verrucomicrobia;<br>c__[Spartobacteria];<br>o__[Chthoniobacteriales];<br>f__[Chthoniobacteraceae];<br>g__Chthoniobacter; s__     |
| Phylotype_93  | 0    | S002223179 | 1    | Granulicella paludicola;<br>LCBR1; FR716684                                                    | k__Bacteria; p__Acidobacteria;<br>c__Acidobacteriia;<br>o__Acidobacteriales;<br>f__Acidobacteriaceae;<br>g__Granulicella; s__paludicola             |
| Phylotype_95  | 0.01 | S003805061 | 0.98 | Granulicella paludicola;<br>Colony1; KC924939                                                  | k__Bacteria; p__Acidobacteria;<br>c__Acidobacteriia;<br>o__Acidobacteriales;<br>f__Acidobacteriaceae; g__; s__                                      |
| Phylotype_162 | 0.01 | S000650671 | 0.96 | Acetobacteraceae<br>bacterium MP03;<br>AM162403                                                | k__Bacteria;<br>p__Proteobacteria;<br>c__Alphaproteobacteria;<br>o__Rhodospirillales;<br>f__Acetobacteraceae; g__; s__                              |

|               |      |            |      |                                           |                                                                                                                         |
|---------------|------|------------|------|-------------------------------------------|-------------------------------------------------------------------------------------------------------------------------|
| Phylotype_217 | 0.01 | S002232422 | 0.98 | Mucilaginibacter sp.<br>HME6636; HM638228 | k__Bacteria; p__Bacteroidetes;<br>c__Sphingobacteriia;<br>o__Sphingobacteriales;<br>f__Sphingobacteriaceae; g__;<br>s__ |
|---------------|------|------------|------|-------------------------------------------|-------------------------------------------------------------------------------------------------------------------------|
